# Supplementary material for: Chronic high-fat feeding impairs adaptive induction of mitochondrial fatty acid combustion-associated proteins in brown adipose tissue of mice
Source: PubMed Central journal article supplement (PMC5614659; doi:10.1016/j.bbrep.2017.02.002), 2017-02-20
Supplement: mmc5.pdf [file mmc5.pdf]

**Table S1**

Body weight gains, tissue weights, and serum nutritional and biochemical parameters of HFD-fed C57BL/6J mice.

| C57BL/6J             | Baseline   | 2 weeks   |             | 4 weeks   |              |
|----------------------|------------|-----------|-------------|-----------|--------------|
|                      |            | LFD       | HFD         | LFD       | HFD          |
| Body weight gain (g) | –          | 2.8±0.2   | 5.7±0.4†    | 1.9±0.4   | 8.9±0.8†     |
| eWAT weight (g)      | 0.28±0.01  | 0.39±0.04 | 0.87±0.14*† | 0.46±0.03 | 1.37±0.12*†  |
| rWAT weight (g)      | 0.06±0.00  | 0.10±0.01 | 0.28±0.04*† | 0.11±0.01 | 0.41±0.03*†  |
| BAT weight (g)       | 0.07±0.01  | 0.06±0.06 | 0.06±0.00   | 0.06±0.00 | 0.07±0.00†   |
| Liver weight (g)     | 0.90±0.01  | 0.93±0.04 | 1.00±0.04   | 0.91±0.02 | 1.00±0.04    |
| Serum level of       |            |           |             |           |              |
| AST (IU/L)           | 36.2±3.9   | 45.6±10.8 | 59.1±12.9   | 44.3±9.2  | 50.6±8.5     |
| ALT (IU/L)           | 12.7±3.6   | 8.9±1.4   | 10.0±1.3    | 6.0±0.8   | 11.6±1.7†    |
| Glucose (mg/dL)      | 113.5±5.0  | 115.8±3.2 | 139.4±16.2  | 123.0±7.1 | 167.3±11.9*† |
| TG (mg/dL)           | 118.9±16.7 | 91.2±8.7  | 81.6±12.1   | 69.0±5.9* | 77.0±7.0*    |
| FFA (mEq/dL)         | 1.40±0.08  | 1.33±0.08 | 1.23±0.08   | 1.42±0.08 | 1.15±0.07†   |

Data represent means ± SEM (9–15 mice). \* $p < 0.05$  vs. baseline; † $p < 0.05$  vs. the LFD group at the same feeding time period. eWAT, epididymal WAT; rWAT, retroperitoneal WAT; AST, aspartate transaminase; ALT, alanine transaminase; FFA, free fatty acid.

**Table S2**

Body weight gains, tissue weights, and serum nutritional and biochemical parameters of HFD-fed ddY mice.

| ddY                  | Baseline   | 2 weeks    |            | 4 weeks   |             |
|----------------------|------------|------------|------------|-----------|-------------|
|                      |            | LFD        | HFD        | LFD       | HFD         |
| Body weight gain (g) | –          | 0.7±0.1    | 4.9±0.8†   | 2.4±0.1   | 10.2±0.7†   |
| eWAT weight (g)      | 0.56±0.05  | 0.56±0.35  | 1.70±0.27* | 1.01±0.33 | 2.43±0.45*† |
| rWAT weight (g)      | 0.21±0.04  | 0.15±0.10  | 0.57±0.10  | 0.28±0.08 | 0.73±0.14*† |
| BAT weight (g)       | 0.15±0.02  | 0.09±0.02  | 0.14±0.02  | 0.17±0.03 | 0.19±0.03   |
| Liver weight (g)     | 1.38±0.05  | 1.39±0.06  | 1.49±0.07  | 1.34±0.12 | 1.49±0.07   |
| Serum level of       |            |            |            |           |             |
| AST (IU/L)           | 45.1±5.9   | 46.6±5.1   | 40.1±5.9   | 49.0±24.2 | 29.3±2.2    |
| ALT (IU/L)           | 9.9±0.3    | 12.3±3.5   | 10.8±0.9   | 7.2±1.9   | 10.0±0.6    |
| Glucose (mg/dL)      | 105.3±13.6 | 142.0±17.8 | 112.3±16.5 | 130.7±1.5 | 172.5±24.4* |
| TG (mg/dL)           | 105.2±20.5 | 62.1±27.2  | 74.2±10.3  | 85.7±27.2 | 71.0±9.1    |
| FFA (mEq/dL)         | 1.29±0.16  | 0.97±0.19  | 1.08±0.15  | 1.14±0.14 | 1.12±0.13   |

Data represent means ± SEM (3–4 mice). \* $p < 0.05$  vs. baseline; † $p < 0.05$  vs. the LFD group at the same feeding time period. eWAT, epididymal WAT; rWAT, retroperitoneal WAT; AST, aspartate transaminase; ALT, alanine transaminase; FFA, free fatty acid.

**Table S3**

Body weight gains, tissue weights, and serum nutritional and biochemical parameters of HFD-fed ICR mice.

| ICR                  | Baseline   | 2 weeks    |             | 4 weeks    |             |
|----------------------|------------|------------|-------------|------------|-------------|
|                      |            | LFD        | HFD         | LFD        | HFD         |
| Body weight gain (g) | –          | 3.0±0.3    | 3.4±0.7     | 3.6±0.4    | 6.1±1.0†    |
| eWAT weight (g)      | 0.77±0.09  | 0.64±0.14  | 1.48±0.35   | 0.92±0.26  | 1.09±0.33*  |
| rWAT weight (g)      | 0.24±0.04  | 0.18±0.04  | 0.51±0.10*† | 0.25±0.07  | 0.41±0.07*† |
| BAT weight (g)       | 0.14±0.01  | 0.11±0.01  | 0.11±0.01   | 0.19±0.03* | 0.11±0.02   |
| Liver weight (g)     | 1.47±0.04  | 1.62±0.07  | 1.55±0.04   | 1.52±0.07  | 1.57±0.09   |
| Serum level of       |            |            |             |            |             |
| AST (IU/L)           | 32.9±3.0   | 43.2±7.6   | 59.2±16.4   | 25.9±2.3   | 38.7±7.3    |
| ALT (IU/L)           | 8.0±0.9    | 10.5±2.6   | 20.1±6.6    | 17.4±8.4   | 12.9±2.4    |
| Glucose (mg/dL)      | 107.0±5.9  | 104.7±10.8 | 151.8±12.4  | 120.7±6.4  | 131.0±20.2  |
| TG (mg/dL)           | 125.2±15.6 | 96.1±25.1  | 62.5±11.9*  | 77.5±15.2  | 57.4±10.1*  |
| FFA (mEq/dL)         | 1.53±0.10  | 1.39±0.19  | 1.13±0.13*  | 1.12±0.08* | 0.95±0.10*  |

Data represent means ± SEM (6–7 mice). \* $p < 0.05$  vs. baseline; † $p < 0.05$  vs. the LFD group at the same feeding time period. eWAT, epididymal WAT; rWAT, retroperitoneal WAT; AST, aspartate transaminase; ALT, alanine transaminase; FFA, free fatty acid.

**Table S4**

Body weight gains, tissue weights, and serum nutritional and biochemical parameters of HFD-fed KK-A<sup>y</sup> mice.

| KK-A <sup>y</sup>    | Baseline   | 2 weeks   |             | 4 weeks    |              |
|----------------------|------------|-----------|-------------|------------|--------------|
|                      |            | LFD       | HFD         | LFD        | HFD          |
| Body weight gain (g) | –          | 4.1±0.6   | 9.7±0.9†    | 7.9±0.7    | 12.2±1.5†    |
| eWAT weight (g)      | 0.89±0.20  | 1.26±0.04 | 1.77±0.14*† | 1.39±0.10* | 1.64±0.08*   |
| rWAT weight (g)      | 0.24±0.06  | 0.31±0.03 | 0.45±0.03*† | 0.34±0.02* | 0.40±0.02*   |
| BAT weight (g)       | 0.15±0.01  | 0.21±0.03 | 0.24±0.02   | 0.19±0.01  | 0.24±0.05    |
| Liver weight (g)     | 1.22±0.07  | 1.24±0.14 | 1.72±0.07   | 1.38±0.03  | 1.78±0.13*†  |
| Serum level of       |            |           |             |            |              |
| AST (IU/L)           | 42.6±14.2  | 73.5±8.2  | 54.2±14.9   | 49.8±23.8  | 42.1±2.5     |
| ALT (IU/L)           | 6.7±1.2    | 10.3±1.7  | 13.0±5.7    | 13.1±1.4   | 9.5±0.9      |
| Glucose (mg/dL)      | 101.3±7.0  | 79.0±48.2 | 233.8±20.4† | 112.7±14.9 | 264.1±57.8*† |
| TG (mg/dL)           | 126.0±19.2 | 111.0±6.6 | 96.1±10.1   | 89.6±6.5   | 75.8±9.4*    |
| FFA (mEq/dL)         | 1.09±0.15  | 1.31±0.07 | 0.93±0.22   | 1.25±0.18  | 0.84±0.08    |

Data represent means ± SEM (3–5 mice). \* $p < 0.05$  vs. baseline; † $p < 0.05$  vs. the LFD group at the same feeding time period. eWAT, epididymal WAT; rWAT, retroperitoneal WAT; AST, aspartate transaminase; ALT, alanine transaminase; FFA, free fatty acid.

**Table S5**

Body weight gains, tissue weights, and serum nutritional and biochemical parameters of HFD-fed C57BL/6J mice.

| C57BL/6J             | Baseline   | 20 weeks   |              |
|----------------------|------------|------------|--------------|
|                      |            | LFD        | HFD          |
| Body weight gain (g) | –          | 11.1±0.8   | 22.3±4.1†    |
| eWAT weight (g)      | 0.28±0.01  | 0.99±0.17* | 1.53±0.17*†  |
| rWAT weight (g)      | 0.06±0.00  | 0.29±0.05* | 1.00±0.18*†  |
| BAT weight (g)       | 0.07±0.01  | 0.12±0.01* | 0.18±0.01*†  |
| Liver weight (g)     | 0.90±0.01  | 1.10±0.04  | 1.56±0.2*†   |
| Serum level of       |            |            |              |
| AST (IU/L)           | 36.2±3.9   | 38.8±2.6   | 56.3±8.7     |
| ALT (IU/L)           | 12.7±3.6   | 3.8±0.6    | 28.1±8.9*†   |
| Glucose (mg/dL)      | 113.5±5.0  | 88.0±11.6  | 179.4±26.4*† |
| TG (mg/dL)           | 118.9±16.7 | 84.1±7.7   | 87.8±21.2    |
| FFA (mEq/dL)         | 1.40±0.08  | 1.06±0.10* | 0.57±0.07*†  |

Data represent means ± SEM (8–9 mice). \* $p < 0.05$  vs. baseline; † $p < 0.05$  vs. the LFD group at the same feeding time period. eWAT, epididymal WAT; rWAT, retroperitoneal WAT; AST, aspartate transaminase; ALT, alanine transaminase; FFA, free fatty acid.
